WINTER 2016 | VOLUME 14 | NUMBER 1

# Focus

The Journal of Lifelong Learning in Psychiatry

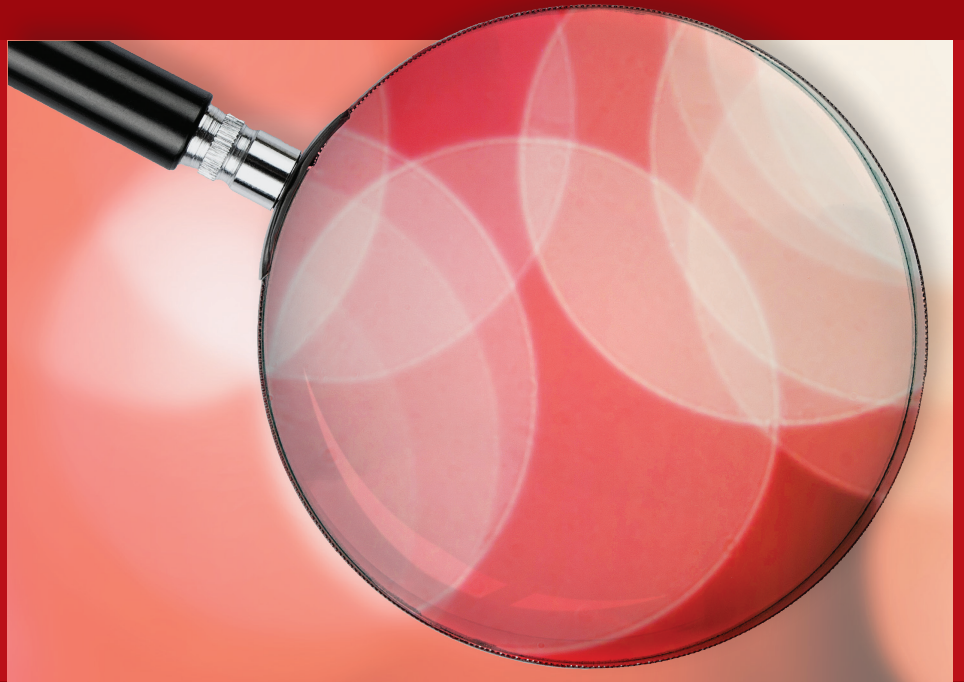

## Psychiatric Treatment of Children and Adolescents

Guest Editors: Arden D. Dingle, M.D., and Sandra Sexson, M.D.

Autism and Related Conditions

Mood Disorders

Trauma- and Stressor-Related Disorders

Attention Deficit Hyperactivity Disorder

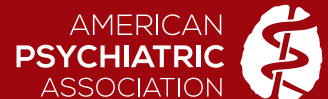

[focus.psychiatryonline.org](http://focus.psychiatryonline.org)
